# Supplementary material for: Fecal microbiota transplantation in a rodent model of short bowel syndrome: A therapeutic approach?
Source: PubMed Central journal article supplement (PMC10020656; doi:10.3389/fcimb.2023.1023441), 2023-03-03

# **Fecal microbiota transplantation in a rodent model of short bowel syndrome: a therapeutic approach?**

## **Supplemental Methods**

*Fecal collection and microbiota analysis:* Feces samples were collected fresh, flash frozen in liquid nitrogen and stored at -80°C. DNA was extracted from around 300 mg of fecal samples collected at day 15 using QIAamp Fast DNA Stool Mini extraction kit (Qiagen) and then quantified on a Qubit4 fluorimeter using the dsDNA HS Assay Kit (Life Technologies; USA). Microbiota composition and diversity were analyzed using an Illumina MiSeq sequencer, after a two-step PCR library preparation. First, the V4 hyper-variable region of the 16S rDNA were PCR amplified (515-F: 5'GTGCCAGCMGCCGCGGT AA3', 806-R:5'GGACTACHVGGGTWTCTAAT 3'), and a second PCR was performed for samples indexing. The 16S rDNA paired-end amplicon reads were processed using the bioinformatics pipeline FROGS software (Find Rapidly OTU with Galaxy Solution), with the Galaxy platform (<https://galaxy.migale.inra.fr/>) (Escudié et al., 2018). Briefly, forward and reverse reads were filtered, trimmed for adaptor and PCR primers removal, merged, and chimeric sequences were removed. A total of 7,619,786 raw read pairs were generated, 7,089,043 were kept after quality filters and clustered in operational taxonomic units (OTUs). Taxonomic assignment was performed against the 16S SILVA version 138 pintail100 database. The species composition and diversities were estimated using the FROGSTAT phyloseq tools on Galaxy. Alpha-diversity within group was estimated using OTU richness (Observed) and Shannon diversity index. Beta-diversity between groups was evaluated by calculating Jaccard or Bray-Curtis distances between samples. Ordination using principal coordinate analysis (PcoA) was performed to represent biodiversity distribution at the OTU level between groups. Individual bacterial taxonomic differences between groups were determined by comparing abundance

values using the LEFSe algorithm (Linear discriminant analysis coupled with the effect size) (Segata et al., 2011).

*Biochemical analyses:* Plasma concentrations of albumin, insulin and leptin were measured by an automatic analyzer AU400 (Olympus Diagnostics, Rungis, France). Fecal SCFA (acetate, propionate, and butyrate) were measured using gas-liquid chromatography (Nelson 1020; Perkin-Elmer, St. Quentin en Yvelines, France), as described in (Lan et al., 2008) and expressed as percentage of the total SCFA extract. Fecal D- and L-Lactates were quantified using the Biosentec D/L lactic acid enzymatic kit (Biosentec, Toulouse, France), according to the protocol published by Mayeur and al. (Mayeur et al., 2013).

*Morphological analyses :* 5-micron-thick sections from Formalin-fixed and paraffin-embedded jejunal and colon samples were stained with hematoxylin phloxine saffron (HPS). Each slide was scanned then and analyzed, using respectively Aperio ScanScope CS System (Leica Microsystems SAS, Nanterre France) and TRIBVN CaloPix software (TRIBVN, Chatillon France).

- Escudié, F., Auer, L., Bernard, M., Mariadassou, M., Cauquil, L., Vidal, K., Maman, S., Hernandez-Raquet, G., Combes, S., Pascal, G., (2018). FROGS: Find, Rapidly, OTUs with Galaxy Solution. *Bioinforma. Oxf. Engl.* 34, 1287–1294. <https://doi.org/10.1093/bioinformatics/btx791>
- Lan, A., Bruneau, A., Bensaada, M., Philippe, C., Bellaud, P., Rabot, S., Jan, G., (2008). Increased induction of apoptosis by *Propionibacterium freudenreichii* TL133 in colonic mucosal crypts of human microbiota-associated rats treated with 1,2-dimethylhydrazine. *Br. J. Nutr.* 100, 1251–1259. <https://doi.org/10.1017/S0007114508978284>
- Mayeur, C., Gratadoux, J.-J., Bridonneau, C., Chegdani, F., Larroque, B., Kapel, N., Corcos, O., Thomas, M., Joly, F., (2013). Faecal D/L Lactate Ratio Is a Metabolic Signature of Microbiota Imbalance in Patients with Short Bowel Syndrome. *PLoS ONE* 8, e54335. <https://doi.org/10.1371/journal.pone.0054335>
- Segata, N., Izard, J., Waldron, L., Gevers, D., Miropolsky, L., Garrett, W.S., Huttenhower, C., (2011). Metagenomic biomarker discovery and explanation. *Genome Biol.* 12, R60. <https://doi.org/10.1186/gb-2011-12-6-r60>

**Supplemental figure 1:** Comparison of the bacterial relative abundance of Lactobacillaceae and Enterobacteriaceae as percentage of the total bacteria in the fecal microbiota of the inocula (black, n=3), Sham (blue, n=6), Sham-FMT (purple, n=6), SBS (orange, n=7) and SBS-FMT (pink, n=8). The asterisks indicates the significant differences between groups, determined using Kruskal-Wallis test and Dunn’s post hoc tests, \*\*p<0.01.

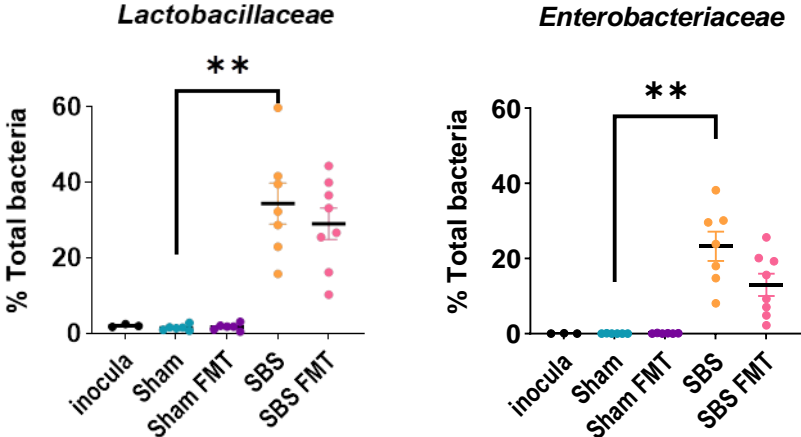

**Supplemental figure 2:** Linear discriminant analysis (LDA) integrated with effect size (LEfSe) ; (A) Cladogram of differentially abundant taxa in Sham (n=6) vs inocula (n=3); (B) Cladogram of differentially abundant taxa in Sham-FMT (n=6) vs. inocula (n=3) ; (C) Cladogram of differentially abundant taxa in SBS (n=7) vs. inocula (n=3) ; (D) Cladogram of differentially abundant taxa in SBS-FMT (n=8) vs. inocula (n=3). The LDA score indicates the effect size and ranking of each differentially abundant taxon;  $p < 0.01$  for LDA score  $> 2.0$ .

A

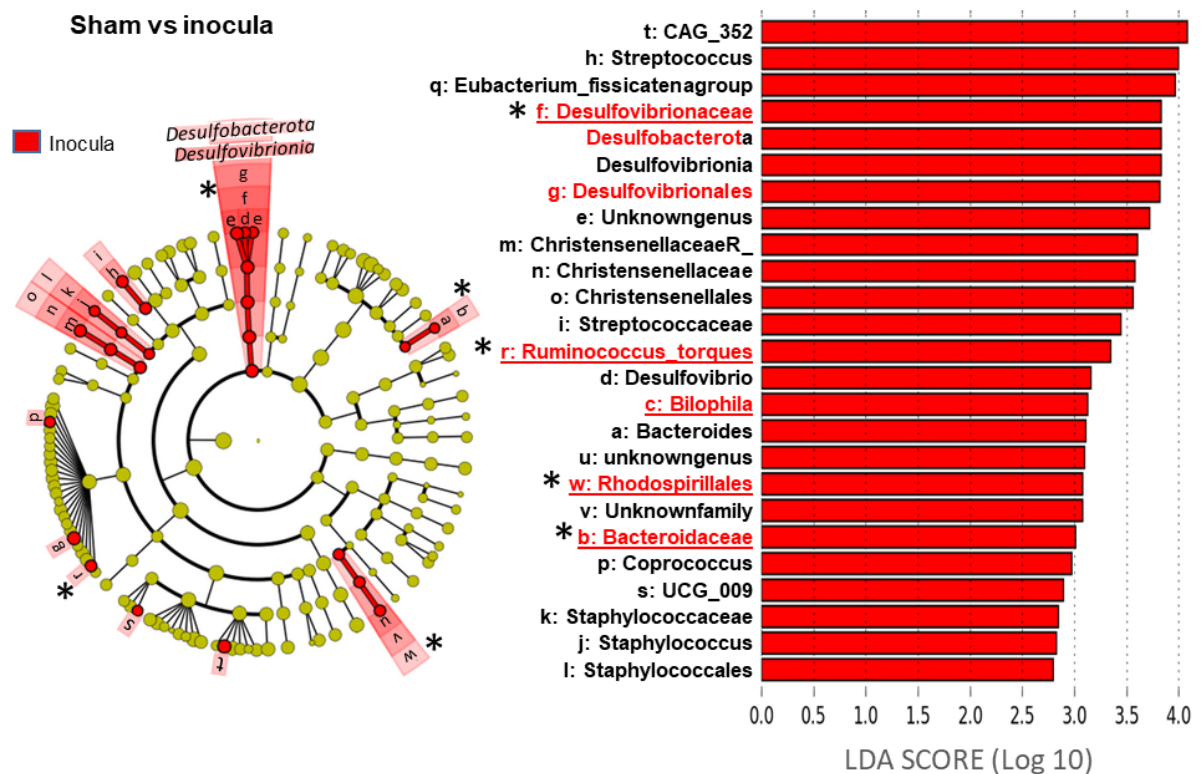

B

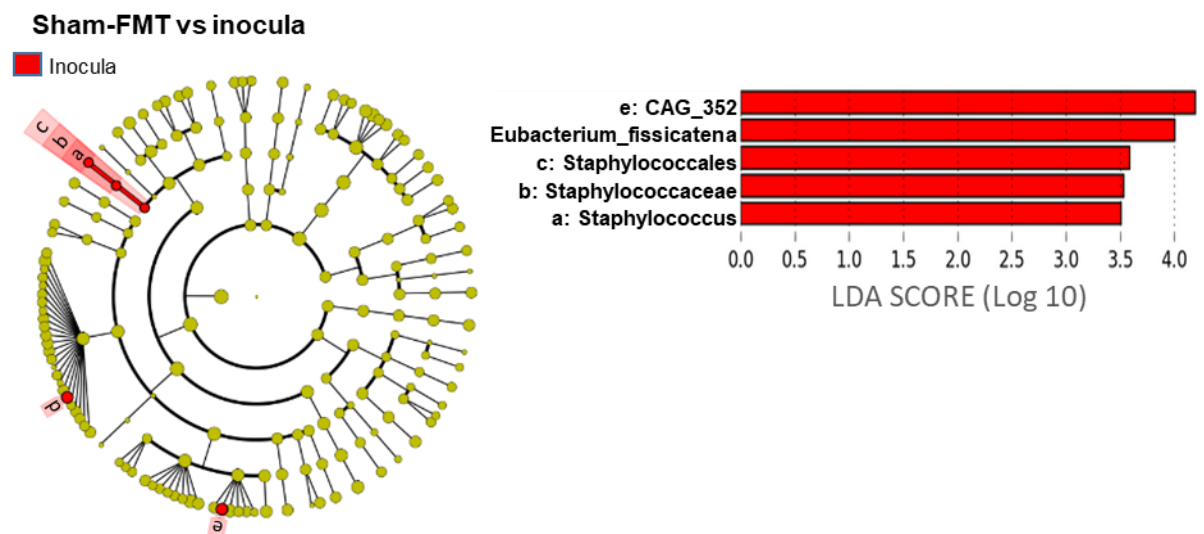

C

SBS vs inocula

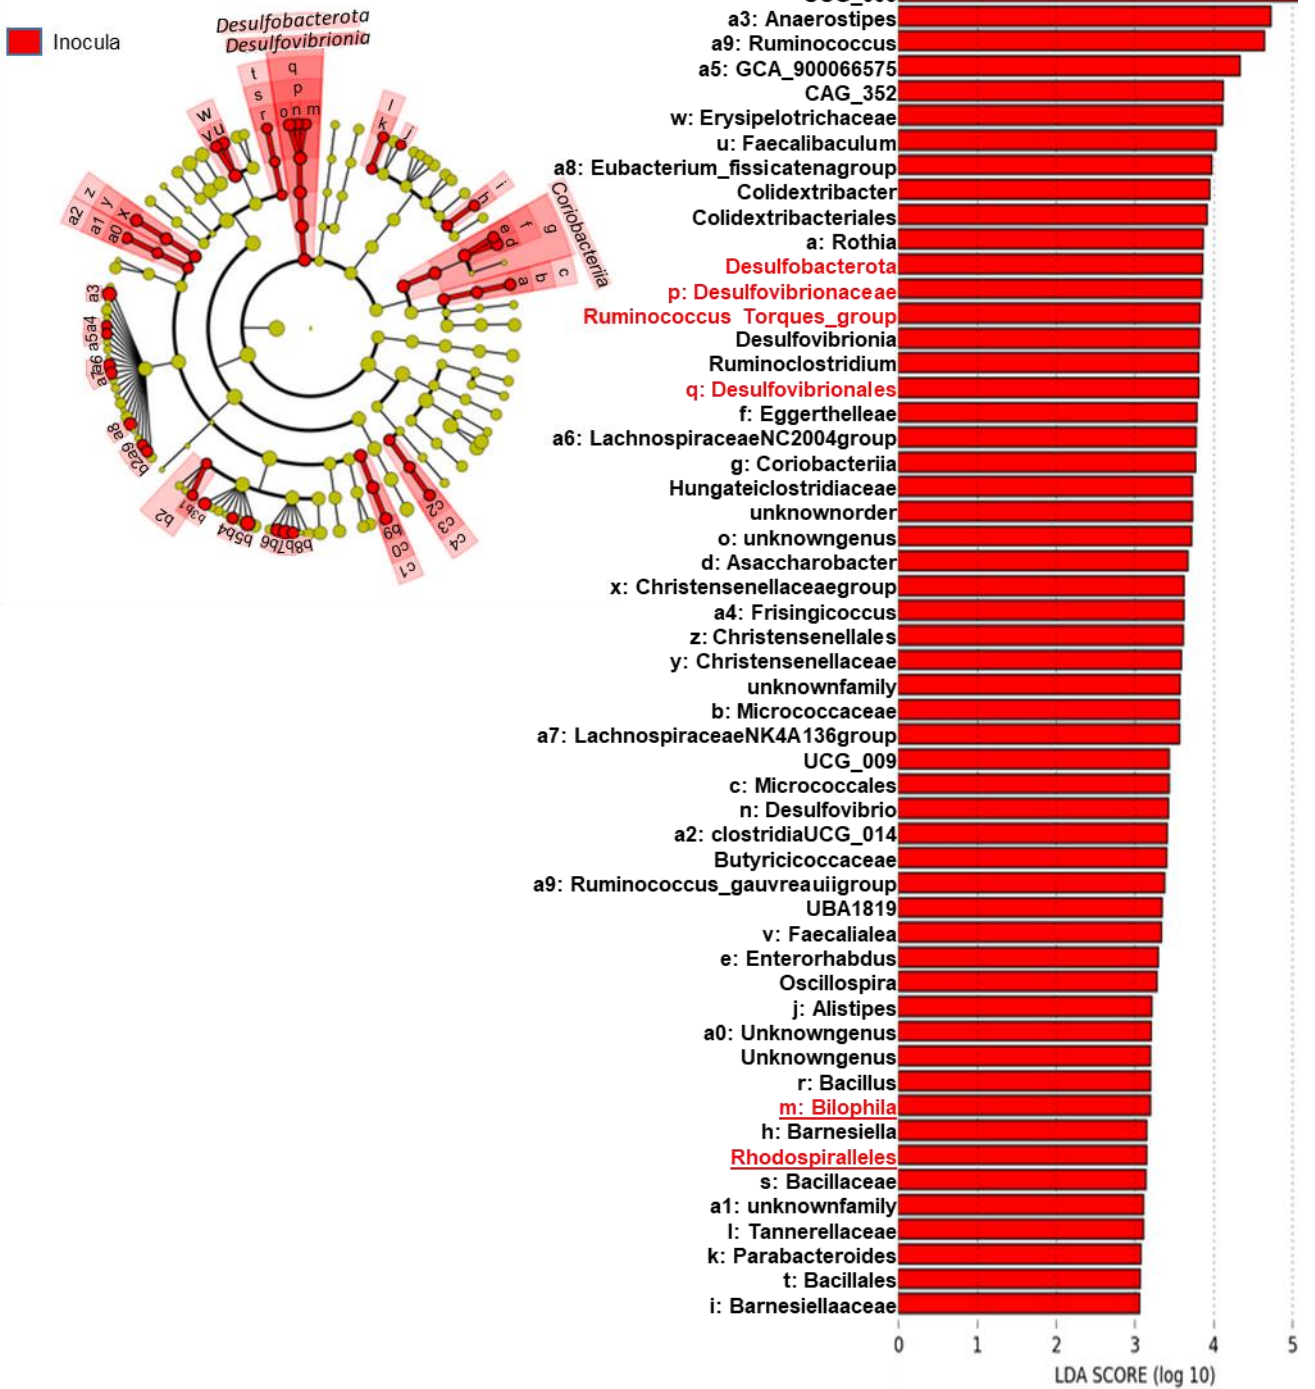

Supplement: DataSheet_1.pdf [file DataSheet_1.pdf]
